# Supplementary material for: Reproductive Outcomes After Breast Cancer in Women With vs Without Fertility Preservation
Source: PubMed Central journal article supplement (PMC7677871; doi:10.1001/jamaoncol.2020.5957), 2020-11-19
Supplement: jamaoncol-e205957-s001.pdf [file jamaoncol-e205957-s001.pdf]

## Supplemental Online Content

Marklund A, Lundberg FE, Eloranta S, Hedayati E, Pettersson K, Rodriguez-Wallberg KA. Reproductive outcomes after breast cancer in women with vs without fertility preservation. *JAMA Oncol*. Published November 19, 2020.  
doi:10.1001/jamaoncol.2020.5957

**eTable 1.** Swedish population registers used to obtain information on cohort.

**eTable 2.** Characteristics of women with breast cancer (BC) in the matched cohort.

**eTable 3.** Characteristics of women with  $\geq 1$  live birth > 10 months after diagnosis of breast cancer, and perinatal outcome for the first live birth if >1 (data for 1995-2017).

**eTable 4.** Characteristics and reproductive outcome of women with ART-treatments after diagnosis of BC (data for treatments available for years 2007-2017).

**eFigure 1.** Choice of fertility preservation method among women with breast cancer.

**eFigure 2.** Study diagram.

**eFigure 3.** Cumulative incidence of childbirth after breast cancer by years since diagnosis, stratified on parity at diagnosis, with death as a competing risk.

This supplemental material has been provided by the authors to give readers additional information about their work.

**eTable 1. Swedish population registers used to obtain information on cohort.**

| Register                                                                              | Description                                                                                                                                                                                                                            | Years     | Information retrieved                                                                    |
|---------------------------------------------------------------------------------------|----------------------------------------------------------------------------------------------------------------------------------------------------------------------------------------------------------------------------------------|-----------|------------------------------------------------------------------------------------------|
| Swedish National Cancer Register                                                      | Since 1958, six regional cancer centers report on all cancer cases, and the data includes histological type, site and stage of tumor, date of diagnosis, eventual date and cause of death, with the coverage rate of 96%. <sup>1</sup> | 1994-2017 | date of BC diagnosis, age at diagnosis, tumor characteristics, treatment details for BC. |
| Swedish National Quality Register for BC                                              | A population-based register, with information on tumor characteristics, treatment, and relapse occurrence in patients diagnosed with invasive BC since 2008, with the coverage rate of 99%. <sup>2</sup>                               | 2008-2017 |                                                                                          |
| Regional quality registers for BC, for regions West and Stockholm-Gotland             | Prior to 2008, data on tumor characteristics, treatment details and relapse occurrence for all cases of invasive BC were reported to the regional quality registers.                                                                   | 1994-2007 |                                                                                          |
| The Total Population Register                                                         | It contains data on life events including birth, death, marital status and migration; maintained by the government agency Statistics Sweden. Updates are transmitted daily from the Tax Agency to the TPR. <sup>3</sup>                | 1994-2018 | date of death, immigrations and emigrations                                              |
| The Swedish Multi-Generation Register                                                 | It contains connections between index persons (registered in Sweden at some time since 1961 and born in 1932 or later) and their biological parents. <sup>4</sup>                                                                      | 1994-2018 | year of livebirths                                                                       |
| Longitudinal integrated database for health insurance and labor market studies (LISA) | It is maintained by the government agency Statistics Sweden and holds annual registers since 1990, integrating existing data from the labor market, educational and social sector. <sup>5</sup>                                        | 1994-2017 | educational level and country of birth                                                   |
| The Medical Birth Register                                                            | It includes data on all births in Sweden since 1973, reported information comes from medical records from the prenatal, delivery and neonatal care. <sup>6</sup>                                                                       | 1994-2017 | date, perinatal and obstetric outcomes of post-diagnosis livebirths                      |
| The National Quality Registry for Assisted Reproduction                               | It was started 2007 and contains data on all ART-treatments in Sweden, in both public and private IVF clinics, with 100% coverage rate of care providers. <sup>7</sup>                                                                 | 2007-2017 | treatment details and outcome of all ART cycles                                          |

Abbreviations: ART, assisted reproductive technology; BC, breast cancer.

References:

1. Socialstyrelsen. Swedish National Cancer Register. Available from: <https://www.socialstyrelsen.se/en/statistics-and-data/register/register-information/swedish-cancer-register/>. [Accessed 1<sup>st</sup> June 2020]
2. Lofgren L, Eloranta S, Krawiec K, Asterkvist A, Lonnqvist C, Sandelin K, et al. Validation of data quality in the Swedish National Register for Breast Cancer. *BMC Public Health*. 2019;19(1):495.
3. Ludvigsson JF, Almqvist C, Bonamy AK, Ljung R, Michaelsson K, Neovius M, et al. Registers of the Swedish total population and their use in medical research. *Eur J Epidemiol*. 2016;31(2):125-36.
4. Ekblom A. The Swedish Multi-generation Register. *Methods Mol Biol*. 2011;675:215-20.
5. Ludvigsson JF, Svedberg P, Olen O, Bruze G, Neovius M. The longitudinal integrated database for health insurance and labour market studies (LISA) and its use in medical research. *Eur J Epidemiol*. 2019;34(4):423-37.
6. Axelsson O. The Swedish medical birth register. *Acta Obstet Gynecol Scand*. 2003;82(6):491-2.
7. The National Quality Registry for Assisted Reproduction. Available from: <https://www.medscinet.com/qivf/>. [Accessed 1<sup>st</sup> June 2020]

**eTable 2. Characteristics of women with breast cancer (BC) in the matched cohort.**

| Characteristic               | Exposed to FP (n=425) | Unexposed to FP (n=850) | P      |
|------------------------------|-----------------------|-------------------------|--------|
| Educational level            |                       |                         |        |
| Compulsory school            | 27 (6.4%)             | 84 (9.9%)               | 0.217  |
| Secondary school             | 151 (35.5%)           | 290 (34.1%)             |        |
| Higher education             | 244 (57.4%)           | 470 (55.3%)             |        |
| Missing                      | 3 (0.7%)              | 6 (0.7%)                |        |
| Country of birth             |                       |                         |        |
| Nordic                       | 345 (81.2%)           | 628 (73.9%)             | 0.004  |
| Non-Nordic                   | 80 (18.8)             | 222 (26.1%)             |        |
| Age at diagnosis, years      |                       |                         |        |
| 21-29                        | 115 (27.1%)           | 128 (15.1%)             | <0.001 |
| 30-34                        | 179 (42.1%)           | 379 (44.6%)             |        |
| 35-42                        | 131 (30.8%)           | 343 (40.3%)             |        |
| Geographical region          |                       |                         |        |
| Stockholm Gotland            | 226 (53.2%)           | 452 (53.2%)             | 1.0    |
| West region                  | 64 (15.1%)            | 128 (15.1%)             |        |
| Other                        | 135 (31.7%)           | 270 (31.7%)             |        |
| Parity at BC diagnosis       |                       |                         |        |
| 0                            | 302 (71.1%)           | 171 (20.1%)             | <0.001 |
| 1                            | 102 (24%)             | 183 (21.5%)             |        |
| >=2                          | 21 (4.9%)             | 496 (58.5%)             |        |
| Year of diagnosis            |                       |                         |        |
| 1994-2007                    | 72 (16.9%)            | 144 (16.9%)             | 0.100  |
| 2008-2017                    | 352 (83.1%)           | 706 (83.1%)             |        |
| Tumor size                   |                       |                         |        |
| T0                           | 15 (3.5%)             | 27 (3.2%)               | 0.036  |
| T1                           | 184 (43.3%)           | 352 (41.4%)             |        |
| T2                           | 190 (44.7%)           | 341 (40.1%)             |        |
| T3                           | 34 (8.0%)             | 119 (14.0%)             |        |
| TX (size cannot be assessed) | 2 (0.5%)              | 11 (1.3%)               |        |
| Lymph nodes with metastasis  |                       |                         |        |
| 0                            | 271(63.8%)            | 478 (56.2%)             | 0.035  |
| 1-3                          | 120 (28.2%)           | 271 (31.9%)             |        |
| >3                           | 34 (8.0%)             | 99 (11.7%)              |        |
| Missing                      | 0 (0%)                | 2 (0.2%)                |        |
| Tumor Grade                  |                       |                         |        |
| 1                            | 26 (6.1%)             | 51(6.0%)                | 0.178  |
| 2                            | 108 (25.4%)           | 177 (20.8%)             |        |
| 3                            | 180 (42.4%)           | 359 (42.2%)             |        |
| Missing                      | 111 (26.1%)           | 263 (30.9%)             |        |
| ER-status                    |                       |                         |        |
| Positive                     | 289 (68.0%)           | 515 (60.6%)             | 0.034  |
| Negative                     | 128 (30.1%)           | 313 (36.8%)             |        |
| Missing                      | 8 (1.9%)              | 22 (2.6%)               |        |
| PR-status                    |                       |                         |        |
| Positive                     | 249 (58.6%)           | 431 (50.7%)             | 0.029  |
| Negative                     | 167 (39.3%)           | 397 (46.7%)             |        |
| Missing                      | 9 (2.1%)              | 22 (2.6%)               |        |
| HER-2                        |                       |                         |        |
| Amplified                    | 108 (25.4%)           | 176 (20.7%)             | 0.158  |
| Non-amplified                | 199 (46.8%)           | 429 (50.5%)             |        |
| Unknown                      | 118 (27.8%)           | 245 (28.8%)             |        |

| <b>Characteristic</b>                                                                                                                                      | <b>Exposed to FP (n=425)</b> | <b>Unexposed to FP (n=850)</b> | <b>P</b> |
|------------------------------------------------------------------------------------------------------------------------------------------------------------|------------------------------|--------------------------------|----------|
| <b>Therapy</b>                                                                                                                                             |                              |                                |          |
| Neoadjuvant                                                                                                                                                | 105 (24.7%)                  | 249 (29.3)                     | 0.100    |
| Adjuvant                                                                                                                                                   | 419 (98.6%)                  | 823 (96.8%)                    | 0.161    |
| <b>Chemotherapy</b>                                                                                                                                        |                              |                                | 0.002    |
| Yes                                                                                                                                                        | 399 (93.9%)                  | 745 (87.7%)                    |          |
| No                                                                                                                                                         | 25 (5.9%)                    | 98 (11.5%)                     |          |
| Missing                                                                                                                                                    | 1 (0.2%)                     | 7 (0.8%)                       |          |
| <b>Radiotherapy</b>                                                                                                                                        |                              |                                | 0.003    |
| Yes                                                                                                                                                        | 317 (74.6%)                  | 650 (76.5%)                    |          |
| No                                                                                                                                                         | 94 (22.1%)                   | 141 (16.6%)                    |          |
| Missing                                                                                                                                                    | 14 (3.3%)                    | 59 (6.9%)                      |          |
| <b>Endocrine therapy</b>                                                                                                                                   |                              |                                | 0.011    |
| Yes                                                                                                                                                        | 281 (66.1%)                  | 498 (58.6%)                    |          |
| No                                                                                                                                                         | 121 (28.5%)                  | 314 (36.9%)                    |          |
| Missing                                                                                                                                                    | 23 (5.4%)                    | 38 (4.5%)                      |          |
| <b>Her2- therapy</b>                                                                                                                                       |                              |                                | 0.040    |
| Yes                                                                                                                                                        | 111 (26.1%)                  | 169 (19.9%)                    |          |
| No                                                                                                                                                         | 253 (59.5%)                  | 549 (64.6%)                    |          |
| Missing                                                                                                                                                    | 61 (14.4%)                   | 132 (15.5%)                    |          |
| NOTE: Data are presented as No (%) unless noted otherwise.<br>Abbreviations: ER, estrogen receptor; FP, fertility preservation; PR, progesterone receptor. |                              |                                |          |

**eTable 3. Characteristics of women with  $\geq 1$  live birth > 10 months after diagnosis of breast cancer, and perinatal outcome for the first live birth if >1 (data for 1995-2017).**

| Characteristic or outcome                                                                                                        | Women with FP (n=83, livebirths n= 119)              | Women without FP (n=62, livebirths n=75)        | P              |
|----------------------------------------------------------------------------------------------------------------------------------|------------------------------------------------------|-------------------------------------------------|----------------|
| Age at time of delivery, years<br>Mean (SD)                                                                                      | 35.3 (3.9)                                           | 35.2 (3.5)                                      | 0.538          |
| Smoking                                                                                                                          | 7 (8.4%)                                             | 3 (4.8%)                                        | 0.398          |
| BMI<br>Mean (SD)<br>Missing                                                                                                      | 23.8 (3.9)<br>8 (9)                                  | 25.1 (4.0)<br>3 (5)                             | 0.014          |
| Family situation<br>Living with a partner                                                                                        | 76 (91.6%)                                           | 58 (93.5%)                                      | 0.318          |
| Time between cancer diagnosis and first post-diagnosis livebirth<br>< 2 years<br>2-5 years<br>>5 years                           | 2 (2.4%)<br>50 (60.2%)<br>31 (37.4%)                 | 1 (1.6%)<br>36 (58.1%)<br>25 (40.2%)            | 0.897          |
| Parity at 1 <sup>st</sup> post-diagnosis live birth<br>0<br>1<br>$\geq 2$                                                        | 64 (77.1%)<br>16 (19.3%)<br>3 (3.6%)                 | 21 (33.9%)<br>18 (29.0%)<br>23 (37.1%)          | <0.001         |
| Number of post-diagnosis births<br>1<br>2<br>$\geq 3$                                                                            | 52 (62.7%)<br>26 (31.3%)<br>5 (6%)                   | 51 (82.3%)<br>9 (14.5%)<br>2 (3.2%)             | 0.036          |
| Mode of conception<br>ART-treatment                                                                                              | 20                                                   | 1                                               | <0.001         |
| Delivery mode<br>Vaginal<br>Assisted vaginal<br>Planned cesarean<br>Unplanned cesarean                                           | 44 (53%)<br>11 (13.25%)<br>11 (13.25%)<br>17 (20.5%) | 46 (74.2%)<br>2 (3.2%)<br>5 (8.1%)<br>9 (14.5%) | 0.044          |
| Gestational age at birth, weeks<br>Mean (SD), range                                                                              | 39.6 (1.7), 32-43                                    | 39.7 (1.6), 34-42                               | 0.269          |
| Gestational weight at birth, grams<br>Mean (SD)<br>Range                                                                         | 3522 (578)<br>1558-4915                              | 3568 (487)<br>2500-4770                         | 0.614          |
| SGA                                                                                                                              | 2 (2.4%)                                             | 0                                               | 0.145          |
| LGA                                                                                                                              | 2 (2.4%)                                             | 0                                               | 0.145          |
| Hypertensive disorders of pregnancy<br>Gestational hypertension<br>Preeclampsia                                                  | 3 (3.6%)<br>2 (2.4%)                                 | 1/62 (1.6%)<br>0/62                             | 0.467<br>0.218 |
| GDM gestational diabetes                                                                                                         | 1 (1.2%)                                             | 0                                               | 0.386          |
| Induced delivery                                                                                                                 | 20 (24.1%)                                           | 8 (12.9%)                                       | 0.091          |
| Apgar <7 at 5 minutes                                                                                                            | 2 (2.4%)                                             | 0                                               | 0.218          |
| Congenital malformation                                                                                                          | 3 (3.6%)                                             | 1 (1.6%)                                        | 0.467          |
| NOTE: Data are presented as No (%) unless noted otherwise.<br>Abbreviations: FP, fertility preservation; SD, standard deviation. |                                                      |                                                 |                |

**eTable 4. Characteristics and reproductive outcome of women with ART-treatments after diagnosis of BC (data for treatments available for years 2007-2017).**

| Characteristic or outcome                                                                                                                                                                                                                                             | Women with FP (n= 48, ART-treatments, n= 107) | Women without FP (n= 10, ART-treatments, n= 18) | P     |
|-----------------------------------------------------------------------------------------------------------------------------------------------------------------------------------------------------------------------------------------------------------------------|-----------------------------------------------|-------------------------------------------------|-------|
| Time between cancer diagnosis and first post-diagnosis ART-treatment                                                                                                                                                                                                  |                                               |                                                 |       |
| <2 years                                                                                                                                                                                                                                                              | 10 (20.8%)                                    | 2 (20%)                                         | 0.857 |
| 2-5 years                                                                                                                                                                                                                                                             | 23 (47.9%)                                    | 4 (40%)                                         |       |
| >5 years                                                                                                                                                                                                                                                              | 15 (31.3%)                                    | 4 (40%)                                         |       |
| Type of ART-treatment                                                                                                                                                                                                                                                 |                                               |                                                 |       |
| IVF (for fresh cycles)                                                                                                                                                                                                                                                | 10                                            | 3                                               | 0.347 |
| ICSI (for fresh cycles)                                                                                                                                                                                                                                               | 30                                            | 8                                               | 0.161 |
| Interrupted                                                                                                                                                                                                                                                           | 17                                            | 5                                               | 0.220 |
| FET                                                                                                                                                                                                                                                                   | 62                                            | 4                                               | 0.005 |
| Use of frozen eggs                                                                                                                                                                                                                                                    | 20 cycles/15 women                            | 1 cycle                                         | 0.080 |
| Donated oocytes                                                                                                                                                                                                                                                       | 1                                             | 0                                               | 0.680 |
| Number of ART-treatments/cycles per woman                                                                                                                                                                                                                             |                                               |                                                 |       |
| 1                                                                                                                                                                                                                                                                     | 21 (43.7%)                                    | 6 (60%)                                         | 0.36  |
| 2                                                                                                                                                                                                                                                                     | 10 (20.8%)                                    | 2 (20%)                                         |       |
| ≥3                                                                                                                                                                                                                                                                    | 17 (35.5%)                                    | 2 (20%)                                         |       |
| Outcome per cycle                                                                                                                                                                                                                                                     |                                               |                                                 |       |
| ET                                                                                                                                                                                                                                                                    | 90                                            | 13                                              | 0.220 |
| Biochemical pregnancies                                                                                                                                                                                                                                               | 4 (2 women, 4 cycles)                         | 0                                               | 0.404 |
| Miscarriage                                                                                                                                                                                                                                                           | 3 (2 women)                                   | 0                                               | 0.472 |
| Livebirths                                                                                                                                                                                                                                                            | 21 (20 women)                                 | 3 (3 women)                                     | 0.768 |
| NOTE: Data are presented as No (%) unless noted otherwise.<br>Abbreviations: ART, assisted reproductive technologies; ET, embryo transfer; FET, frozen embryo transfer; FP, fertility preservation; IVF, in vitro fertilization; ICSI intraplasmatic sperm injection. |                                               |                                                 |       |

**eFigure 1. Choice of fertility preservation method among women with breast cancer. COS, controlled ovarian stimulation.**

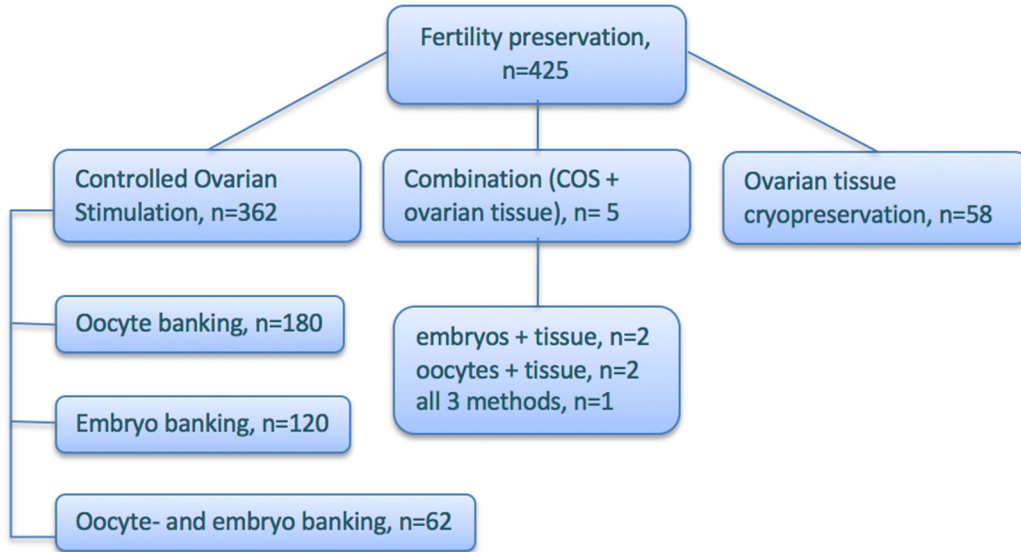

**eFigure 2. Study diagram. FP, fertility preservation.**

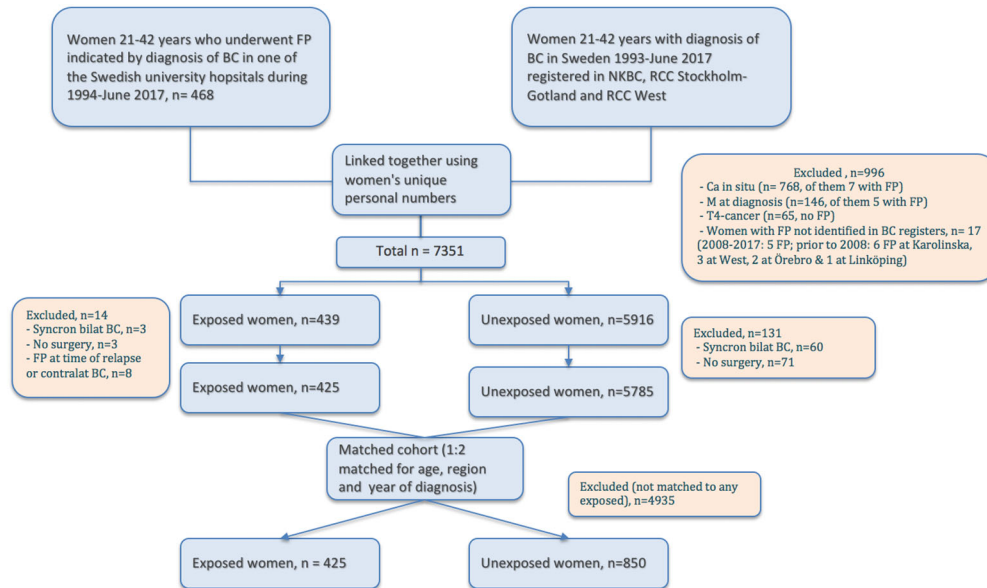



**eFigure 3. Cumulative incidence of childbirth after breast cancer by years since diagnosis, stratified on parity at diagnosis, with death as a competing risk. FP, fertility preservation.**

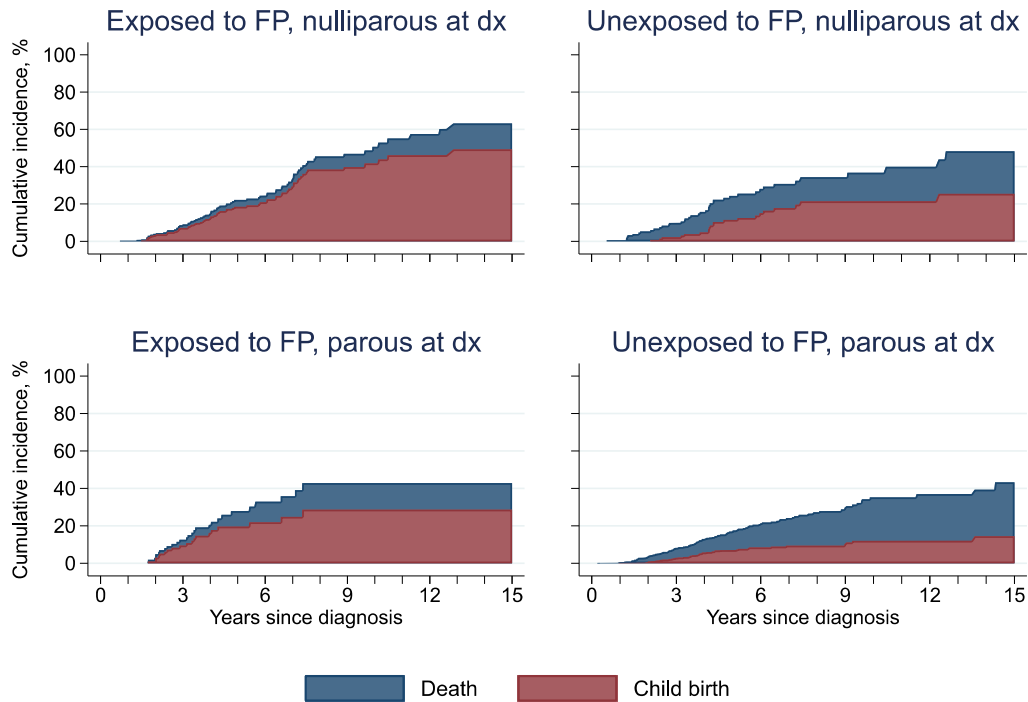

|                                 | Exposed to FP       |                      | Unexposed to FP     |                      |
|---------------------------------|---------------------|----------------------|---------------------|----------------------|
|                                 | 5-year CIF (95% CI) | 10-year CIF (95% CI) | 5-year CIF (95% CI) | 10-year CIF (95% CI) |
| <b>Nulliparous at diagnosis</b> |                     |                      |                     |                      |
| Death                           | 3.9 (1.9-7.9)       | 12.9 (6.2-25.8)      | 13.4 (8.4-20.8)     | 16.6 (9.8-27.2)      |
| Child birth                     | 19.0 (14.2-25.1)    | 43.4 (34.3-53.8)     | 12.7 (7.6-21.1)     | 24.3 (15.9-36.0)     |
| <b>Parous at diagnosis</b>      |                     |                      |                     |                      |
| Death                           | 9.7 (4.2-21.6)      | 17.4 (8.2-34.7)      | 10.5 (7.9-13.9)     | 25.2 (19.3-32.5)     |
| Child birth                     | 20.2 (12.7-31.3)    | 30.8 (19.2-47.2)     | 7.5 (5.3-10.5)      | 13.4 (9.3-19.0)      |
